# Supplementary material for: The Genetic Complexity of Type-IV Trichome Development Reveals the Steps towards an Insect-Resistant Tomato
Source: MDPI journal article supplement (doi:10.3390/plants11101309), 2022-05-14
Supplement: s1 [file s1]

**Table S1.** Oligonucleotide sequences used in this work.

| Primer       | Sequence                                            | Gene Model     | Utilization | Reference |
|--------------|-----------------------------------------------------|----------------|-------------|-----------|
| 1B           | AGCACTTATGGGCTGTTC<br>CAGCGCATCTTGAGTGTGT           | Solyc01g088100 | CAPS marker | This work |
| 2A           | ACAACGACTAGAACGGCTGG<br>CCCATCACAACTAATGTCTAAGG     | Solyc02g092570 | CAPS marker | This work |
| 2B           | GCACAACATCCACCCTTCTT<br>CAAGCACATACGATTGCAGA        | Solyc02g093030 | CAPS marker | This work |
| 2C           | GAAGGGTCGGGTACAAGGTAA<br>CCACTCTCTTAGCCTGAATGG      | Solyc02g094500 | CAPS marker | This work |
| 3A           | GCTCTGAAGATCCTACACATGAAA<br>TCCCATGCTCTTTCTGGAAC    | Solyc03g019800 | CAPS marker | This work |
| 3B           | CGGCGTAAGACAAACACGTTC<br>GCATTATCAACTCATCTACCAGTCC  | Solyc03g083830 | CAPS marker | This work |
| 3C           | TTGGGAGATTAGCGTAAGGAG<br>ATAGGAGCAACAAGGTACATGC     | Solyc03g093610 | CAPS marker | This work |
| 6A           | GCAGTGTGATGCTGGTGTTT<br>AGGCGACTTGGTTGTCACTC        | Solyc06g005060 | CAPS marker | This work |
| 6B           | TGTTGTTTCCCTTGTTGCAG<br>GCCAGTTTGAACCAGACCAG        | Solyc06g009730 | CAPS marker | This work |
| 6C           | AGCTAAGATGGAGGGAGATGC<br>CCCGAGGTGTAACTGTAACG       | Solyc06g048460 | CAPS marker | This work |
| 6D           | AAAACACGGCGATGAGAAAT<br>TTTCCTCTCCAATTCCAAT         | Solyc06g060210 | CAPS marker | This work |
| <i>FW2.2</i> | GGTGGTGTGATGTGGAGTGAGTG<br>GGCAGATACATAGTGAGGAGGAAC | Solyc02g090730 | CAPS marker | This work |
| <i>DWARF</i> | TGATCCATATTCGTTCAATCCA<br>CGTGATTATGTTAGCGGGAAT     | Solyc02g089730 | CAPS marker | This work |

|                 |                                                           |                |             |           |
|-----------------|-----------------------------------------------------------|----------------|-------------|-----------|
| <i>FW3.2</i>    | GAGATAACGGGTAAATAGAGT<br>TAGTTAGGATAGTTATAGTTTGC          | Solyc03g114940 | CAPS marker | This work |
| <i>EJ-2</i>     | CACAATTCATGCTGGATCAGC<br>CGGAGTAATCTATTAGATTCTGC          | Solyc03g114840 | CAPS marker | This work |
| <i>SP5G</i>     | TAATTACGCAGTGACGAAGCA<br>TTGACACAGAGTTCGAGAACG            | Solyc05g053850 | CAPS marker | This work |
| <i>SP</i>       | GGGTTGAAGTTCATGGTGGT<br>AGTGCCTGGAATGTCTGTGA              | Solyc06g074350 | CAPS marker | This work |
| <i>PTS</i>      | AGGAAGTGATTGACCCATGC<br>CCCCAAACACCACTATCTAAGC            | Solyc06g072480 | CAPS marker | This work |
| <i>ASAT1</i>    | GGGAGGCCAAGACAAGTTGATA<br>TGGAGAAGCAAAGTGAAGAAAATC        | Solyc12g006330 | qPCR        | [12]      |
| <i>ASAT2</i>    | GACTCCATTTCGTCCATCTTTACTTC<br>TTTGACTTCTTCTTCTCCTTTCTTA   | Solyc04g012020 | qPCR        |           |
| <i>ASAT3</i>    | TTTCTTCCCTTTACCGTCTGAA<br>TGAACAAGTGCTGAGGCAAC            | Solyc11g067270 | qPCR        | This work |
| <i>ASAT4</i>    | GGTGGTCGTGATGTCCCTAA<br>GCCCTCCTTGTTAGCAGTTG              | Solyc01g105580 | qPCR        | This work |
| <i>ASH1</i>     | TCTTTCATCCAACGTGATTAACATTT<br>ATCTACACCACAGAACACTACCAATA  | Solyc05g051660 | qPCR        | This work |
| <i>ASH2</i>     | GCGACCCACTGAATAGCATC<br>GGCGGAGGATTTGTATTAGGA             | Solyc05g051670 | qPCR        | This work |
| <i>ASH3</i>     | CTACACTCAAATCAACTTCCATACCATA<br>ATAGAACCGTTCGACTCGACCATTT | Solyc09g075710 | qPCR        | [51]      |
| ABC transporter | TCCGAAGGGATGATGGAG<br>GCAGAAGACCAAATACAGGGTAA             | Solyc03g005860 | qPCR        | This work |
| <i>ACTIN</i>    | GGTCCCTCTATTGTCCACAG<br>TGCATCTCTGGTCCAGTAGGA             | Solyc04g011500 | qPCR        | [71]      |

|             |                                              |                |      |      |
|-------------|----------------------------------------------|----------------|------|------|
| <i>EF1α</i> | AAGCCCATGGTTGTTGAGAC<br>TTCTTGACAACACCCACAGC | Solyc06g005060 | qPCR | [72] |
|-------------|----------------------------------------------|----------------|------|------|

## References

1. Fan, P.; Miller, A.M.; Schilmiller, A.L.; Liu, X.; Ofner, I.; Jones, A.D.; Zamir, D.; Last, R.L. In Vitro Reconstruction and Analysis of Evolutionary Variation of the Tomato Acylsucrose Metabolic Network. *Proc. Natl. Acad. Sci. U.S.A.* **2016**, *113*, doi:10.1073/pnas.1517930113.
2. Schilmiller, A.L.; Gilgallon, K.; Ghosh, B.; Jones, A.D.; Last, R.L. Acylsugar Acylhydrolases: Carboxylesterase-Catalyzed Hydrolysis of Acylsugars in Tomato Trichomes. *Plant Physiol.* **2016**, *170*, 1331–1344, doi:10.1104/pp.15.01348.
3. Silva, N.C.Q.; de Souza, G.A.; Pimenta, T.M.; Brito, F.A.L.; Picoli, E.A.T.; Zsögön, A.; Ribeiro, D.M. Salt Stress Inhibits Germination of *Stylosanthes Humilis* Seeds through Absciscic Acid Accumulation and Associated Changes in Ethylene Production. *Plant Physiology and Biochemistry* **2018**, *130*, 399–407, doi:10.1016/j.plaphy.2018.07.025.
4. Pinto, M. de S.; Abeyratne, C.R.; Benedito, V.A.; Peres, L.E.P. Genetic and Physiological Characterization of Three Natural Allelic Variations Affecting the Organogenic Capacity in Tomato (*Solanum lycopersicum* cv. Micro-Tom). *Plant Cell Tiss Organ Cult* **2017**, *129*, 89–103, doi:10.1007/s11240-016-1159-2.

**Table S2.** Genomic coordinates (ITAG2.5) of the genetic variation from *S. galapagense* present at high frequencies ( $\geq 0.8$ ) in the *Get*-like phenotypical group of the MT-*Get* segregating population.

| Chromosome | Corresponding Region (bp) |
|------------|---------------------------|
| 1          | 82,558,349 – 83,597,817   |
| 2          | 53,604,856 - 55,297,272   |
| 3          | 61,495,951 - 65,007,167   |
| 5          | 19,540,000 - 19,637,400   |
| 6          | 3,688 - 38,647,717        |

**Table S3.** GC-MS content of acyl groups in *S. galapagense*, MT-*Get* and Micro-Tom (MT).

| RT | Acyl Groups Content | Genotypes             |                |      |
|----|---------------------|-----------------------|----------------|------|
|    |                     | <i>S. galapagense</i> | MT- <i>Get</i> | MT   |
| 1  | 2-Methyl Butanoate  | 0.77 ± 0.30           | 0.00           | 0.00 |
| 2  | 3-Methyl Butanoate  | 2.86 ± 1.20           | 0.00           | 0.00 |
| 3  | Methyl Decanoate    | 0.18 ± 0.07           | 0.00           | 0.00 |
| 4  | Methyl Dodecanoate  | 2.92 ± 0.90           | 0.06 ± 0.00    | 0.00 |

Data are means (n =8) ± SD.
